# Supplementary material for: Genetic Analysis of Vertebral Regionalization and Number in Medaka (Oryzias latipes) Inbred Lines
Source: Oxford University Press journal article supplement (doi:10.1534/g3.112.003236), 2012-11-01
Supplement: 1317_003236si.pdf [file 1317_003236si.pdf]

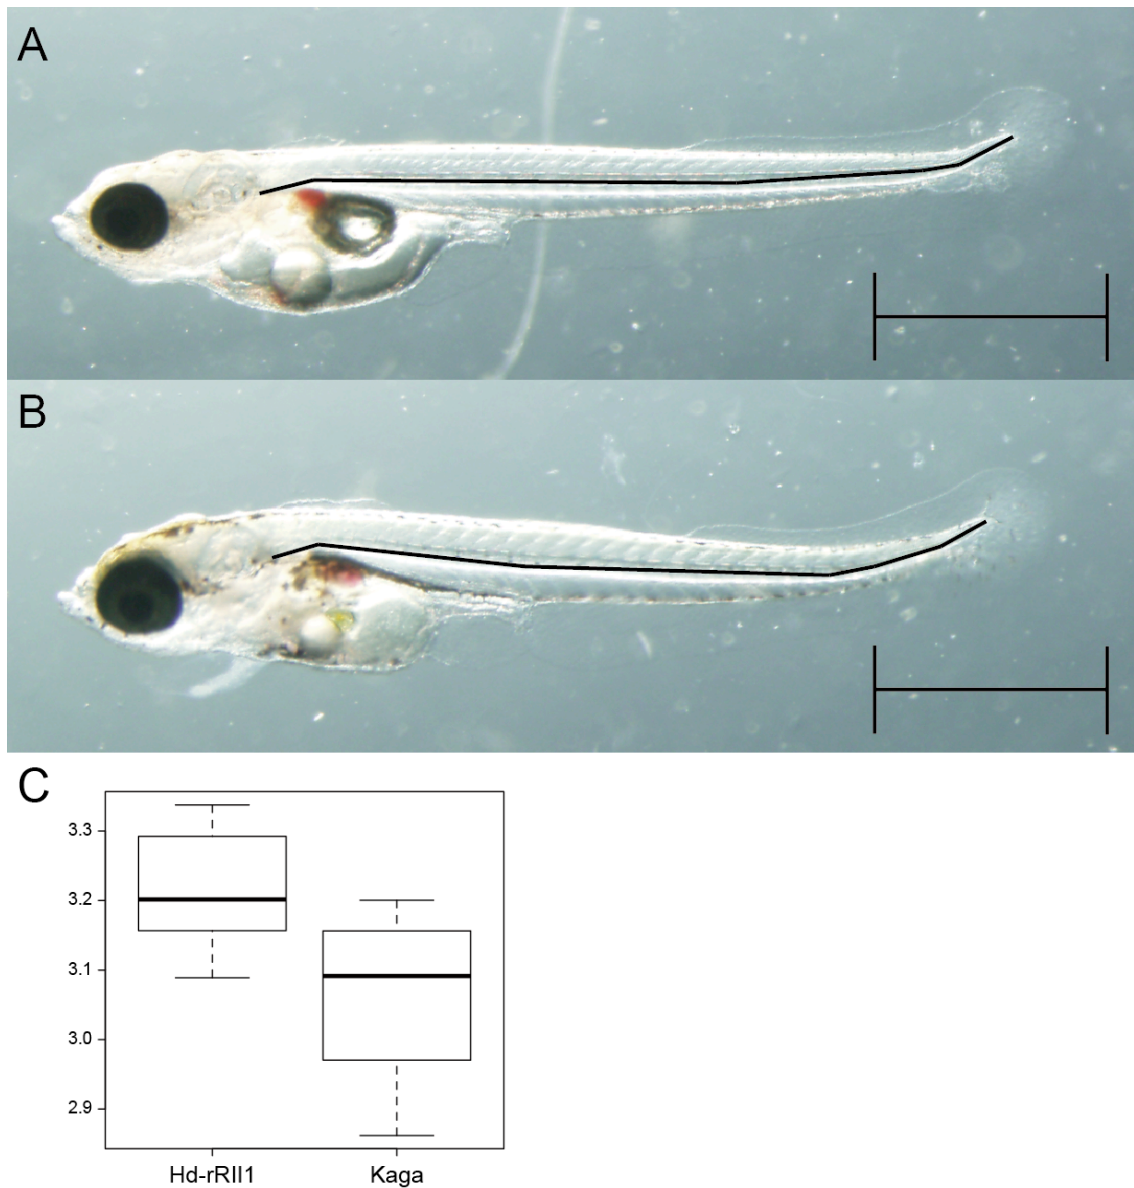

**Figure S1** Measure of fry of Hd-rRII1 and Kaga. Photo is seven days fry of Hd-rRII1 (A) and Kaga (B). The scale bars represent 1 mm. Straight line was drawn along with notochord and it was considered as trunk length. The length was measured in imageJ software. (C) Boxplot of the trunk length. The mean  $\pm$  S.E.M. of the trunk length of are  $3.22 \pm 0.02$  mm in Hd-rRII1 ( $n = 16$ ), and  $3.06 \pm 0.04$  mm in Kaga ( $n = 11$ ), respectively. Hd-rRII1 is longer than Kaga in this stage. The trunk length showed significant difference as judged by Welch's  $t$  test ( $p = 0.002$ ).

**File S1**

**Input Data**

Available for download at <http://www.g3journal.org/lookup/suppl/doi:10.1534/g3.112.003236/-/DC1>.

**Table S1 Marker information**

| Marker  | Chromosome | Position (cM) | Primer1                        | Primer2                        | Amplicon size (bp) |      |
|---------|------------|---------------|--------------------------------|--------------------------------|--------------------|------|
|         |            |               |                                |                                | Hd-rRII1           | Kaga |
| MID0111 | 1          | 0.0           | TGCTAACATTTTCTTGCATCTAAAG      | GCACCACCATAGCCAACCT            | 150                | 135  |
| MID0127 | 1          | 14.8          | AATGAAGACCAGAACATGTTTCTAAAT    | TGTAGTTATTGCATTGCCTAATTTAAT    | 147                | 130  |
| MID0124 | 1          | 23.2          | TCAGTCCCAAATGGCTTAAAC          | AATCTGCTTCTCATTCTTCAGTG        | 148                | 134  |
| MID0122 | 1          | 35.3          | CATAAGTAACTTTCATACACTCATGATTAA | TAGCGAGACGATTTTGGTCC           | 103                | 91   |
| MID0117 | 1          | 49.5          | GGCCCTTTGAGGACAGCC             | AAAACATAAAGTGAATCTTTTAAAAAGTCC | 157                | 131  |
| MID0118 | 1          | 62.0          | GAGTCTTGAGACTGATGGCAGC         | CGCCCTGCTCCGGCCTCG             | 208                | 132  |
| MID0119 | 1          | 77.5          | GGTCTTTGTACACATTCTGTGAG        | CAGAGGTAGACATGCCTTGATATG       | 143                | 121  |
| MID0211 | 2          | 0.0           | GCTGCTGCGTTCTGAACAA            | AACTTTGTTGGAATCACTGTTCTCC      | 125                | 104  |
| MID0221 | 2          | 20.6          | CTGTCAATCCTTCAAATGCTG          | ACCGGAAAGGACAAAGGTC            | 100                | 93   |
| MID0229 | 2          | 30.7          | CCAACAAAACACCACCGTC            | CGTAATGGACATTTTAGAACTTCC       | 164                | 142  |
| MID0215 | 2          | 39.8          | AGTAGGCACACAAAATGTTCCGG        | CGCCGGCGTTCAGGTGGG             | 120                | 111  |
| MID0216 | 2          | 54.7          | CTTGAGGGCCACAGTGTCTAC          | CTGTCCAATCTGAACACAACATAAAAC    | 199                | 152  |
| MID0231 | 2          | 68.0          | TGTGGCTCCGCCTTCTCC             | GAAAGAATGTTAAGTGAAAGTAACTTTTAG | 160                | 137  |
| MID0220 | 2          | 78.8          | AGGCCACATAGAGGCCAAC            | TCTGATGTCCCCTCATTCTCTG         | 150                | 155  |
| MID0311 | 3          | 0.0           | CATGACGTAGAAAAAGTGACGTG        | TTTCTGGCTTCTTATGGATTCA         | 126                | 114  |
| MID0321 | 3          | 11.8          | TCCCTCACTGCACGGTGT             | AAGAGATACTTTTGTAATTACAAATGAGG  | 103                | 89   |
| MID0316 | 3          | 31.8          | GTTTTTGGTCTTTGATTTTACATCAGT    | ATCACCACAGGATGATGATGAA         | 103                | 91   |
| MID0322 | 3          | 41.9          | CATGACATAACTGACACAAACCAAAC     | CCCCTTGGCTGTATTTCTCTG          | 205                | 181  |

|          |   |      |                                |                                |         |        |
|----------|---|------|--------------------------------|--------------------------------|---------|--------|
| MID0323  | 3 | 56.6 | AAACTCCTTCGTGCCGTG             | TTGTGTTCCCAGCATGAAAG           | 104     | 107    |
| MID0318  | 3 | 69.3 | CAGGAGAACAAAGACCAAGATCTG       | TCCTCTGAAGACCTGAGACG           | 184     | 148    |
| MID0421  | 4 | 0.0  | TCATTCTTGTTGTAAAATGCTTG        | AGCCGCTCCATACCCCCCTA           | 168     | 146    |
| MID0412  | 4 | 12.7 | CCACTGATTAATAACTACTTGTTCTGTAC  | CAAAGCCATTTTTGGTATTTTTTTC      | 133     | 109    |
| MID0414  | 4 | 23.6 | TTGCTGCATAAACTACAATTTAATC      | CAAAGTGTTTTGCAGACAGACA         | 143     | 128    |
| MID0425  | 4 | 35.8 | AGCTTTTTCAAGTTTTAACCTTAAATTATT | ACAGAGAAAACAAAGACCTCAAGTCTG    | 195     | 174    |
| MID0424  | 4 | 46.2 | ATATCAACTGTCATAAACATCAAAGG     | GACATGTTAGTAGTTTAGAGATCACAAC   | 100     | 85     |
| MID0428  | 4 | 53.4 | AATGAAGATTCTGCCAAAAGAG         | AATGAAAATATTTGTTTATATTATTCCTTG | 100     | 88     |
| MID0418  | 4 | 64.4 | TGTTCTCAAACCTGCAGCAGG          | GAGGAGTCCAGGTCTTACGTCG         | 165     | 135    |
| MID0511  | 5 | 0.0  | ATAAGAGAACTGGACTGAGTGAGAGTG    | ATGATGACTCAGACCCACTGAGT        | 97, 104 | 85, 92 |
| MM03D01K | 5 | 15.1 | AACAACAGTTTCACAACCTCTG         | CCCATATTCCTTCTGACTGC           | 198     | 219    |
| MID0515  | 5 | 30.5 | CTGTCTTCAAAGTTAATAGTTTTGACAG   | GTCATAAAACAGCTGAAAATGTCTC      | 151     | 132    |
| MID0517  | 5 | 43.0 | TACACCATGAAGTGGCATCATT         | AAAACTATCCATCCATTCATTTTCTTAAC  | 161     | 131    |
| MID0518K | 5 | 52.8 | TAATCTAAAAGCACCATCTCTCTTTTAC   | ACAAACTGCTCAATGAGAAAAGTACC     | 203     | 180    |
| MM05D05K | 5 | 67.2 | CTCCATTCAGGACCACATC            | ACTGAGATGGAGGTAAGGAAC          | 206     | 182    |
| MID0611  | 6 | 0.0  | TTAACTCTCCCTACTTAACCGCTTA      | CAGAGCCAAGTTTTGCGTG            | 172     | 149    |
| MID0602  | 6 | 13.4 | TGATGGACTGAAACTCAGATGAAG       | CTGCCTAAGCTCTCATGGGG           | 155     | 142    |
| MID0614  | 6 | 26.4 | AGAACGTTCACTGTGGCTC            | GCACTTGCACTTTGGAAAGG           | 197     | 159    |
| MID0623  | 6 | 36.2 | CTGGTGCTGCTGCTTCTT             | CTGCAATCCTCTGCATGTC            | 200     | 174    |
| MID0616  | 6 | 59.4 | GCTTTATACTAGTCATTACACACCACA    | CACACTTAGAAACGGCTTTAAAACA      | 270     | 258    |
| MID0711  | 7 | 0.0  | CCCCCAGATCAGCAGCAG             | TACAATTATCGCCTTTGCACC          | 144     | 123    |

|         |    |      |                                 |                                 |     |     |
|---------|----|------|---------------------------------|---------------------------------|-----|-----|
| MID0722 | 7  | 14.3 | TTTCTCCCTCACAACAACC             | CTTTTTGGTGTCTTAACATATTGTTTTAG   | 142 | 127 |
| MID0723 | 7  | 25.9 | GTGTTTGATTGCTTGATTGTGT          | AGTTCAAACCTTCGTAGAAAAATAAG      | 150 | 131 |
| MID0712 | 7  | 31.9 | TTCATCTTCCAACAATCATTGCT         | CAGACCTTCACACTTCACAATGAC        | 105 | 94  |
| MID0703 | 7  | 38.8 | TGTAAGTGGGAAAATAATAAGCATATAGG   | TTTAGAAAACACAGCTCTCTGAGAAAAG    | 199 | 179 |
| MID0714 | 7  | 48.0 | TGTATAGAAAAGAGCACAAAAGCACA      | GTTGTTTGTGCCAAACATGAAG          | 140 | 122 |
| MID0706 | 7  | 60.6 | ACATTATATGGATTCCCTTAATGAATGTCTT | AAACTGACCAGTAGAATACTTCAGCTTATC  | 152 | 133 |
| MID0811 | 8  | 0.0  | CCGCCTAAGTCTGGGTCC              | TGCAGAGTACGATTCAGCATATC         | 142 | 120 |
| MID0812 | 8  | 17.2 | TTATGCAAACATTTTCAGTAAATGC       | GTTTCTGTGACTGCATTTCTGAAG        | 138 | 116 |
| MID0821 | 8  | 26.0 | AGGATCTGCAAAAGTGCAA             | CGTGTTTTGAAATGACTTATCACA        | 195 | 159 |
| MID0826 | 8  | 39.6 | TGTA AAAACCTAAAGTTGTTACTCAATAA  | AGATTA AATCTGCAATAGTTGGTA       | 139 | 120 |
| MID0823 | 8  | 55.6 | TAATCCGTAGATCGTCTGGTAATCTC      | GCTTTGGTTCAGTTTGTTCATAAAG       | 142 | 130 |
| MID0911 | 9  | 0.0  | TCTGGACGCAGATTTTTGTCC           | TTTCTTTACCTGTGATGACG            | 153 | 136 |
| MID0923 | 9  | 9.1  | ACACGTGAGCTAAAGCTCTGG           | GACTTTGGGACTTGATTGTAACA         | 128 | 115 |
| MID0921 | 9  | 18.8 | CACGAGGCAGTCAGAGTCC             | TACCAA ACTGTAAAACTGTTTCACG      | 105 | 90  |
| MID0913 | 9  | 25.4 | CCTGTGACATTTACCACATGTGTG        | AAAAACATTTTCTTTAACA ACTTTTTTCTC | 101 | 85  |
| MID0914 | 9  | 33.9 | GGACACTGTGATTGGCATAGTTTTG       | GTTAAATCACAACCAAGTCCAATG        | 101 | 87  |
| MID0916 | 9  | 46.5 | AAAGTCGCAACAAGTTGG              | AGTCAGATAAATCTGGACTTTATAACACG   | 100 | 84  |
| MID0922 | 9  | 61.4 | GTTAGGGCTCGCTGGTTTG             | GGAGGCCATGGAGTGGTT              | 114 | 101 |
| MID1011 | 10 | 0.0  | CAGGCAGATGAAGACTCTGCAG          | TAGGCAGTTGTTGATAAACTGGG         | 149 | 131 |
| MID1025 | 10 | 10.5 | CATAGGTGAGTATAATTTATAATCCTGAC   | TCATGAAAATGGAACGTACCA           | 84  | 93  |
| MID1024 | 10 | 20.6 | CAGCCAAAAACAGAGGAGAG            | GGCACCTAATTGGACATTGT            | 144 | 136 |

|         |    |      |                                |                                 |     |     |
|---------|----|------|--------------------------------|---------------------------------|-----|-----|
| MID1014 | 10 | 39.1 | TGTCCCCAACTGCTGAACATC          | GGAATTCCTACTGAAGAATAAAATGAAAAAC | 98  | 84  |
| MID1028 | 10 | 48.6 | TGGTGCTTGTGGAGCAAAG            | CAACCGGGACAAGGAGTG              | 156 | 131 |
| MID1015 | 10 | 64.3 | CTGCTTGTCTGACAGCTGCG           | GTTCTGCAGAACCGGG                | 154 | 145 |
| MID1121 | 11 | 0.0  | GATGAAACGTCTTTGGCACTC          | AGCAGAGGTGAAAGGTGGATG           | 123 | 133 |
| MID1125 | 11 | 6.0  | GGCTCCCAGGTGGCAAC              | TCTGCCCATGCAGAGACG              | 106 | 97  |
| MID1123 | 11 | 24.1 | ACTTTAGCCGATCCTCTAATAATTAC     | ATCTTGTCAATTTATCTCCATAGC        | 101 | 92  |
| MID1112 | 11 | 29.8 | ACCTTCAGTTTGTACTTTTAAGCAGATTC  | CTGGATTTGATCTTTTGTCTTAATTTTC    | 149 | 115 |
| MID1113 | 11 | 39.3 | TGTTTTTGTAAACAAAACGTACATT      | AGCCTATGACCTTCACCCG             | 152 | 123 |
| MID1116 | 11 | 51.6 | CTCGCGTCTGAATTTTTGGG           | CAGGACAAAGAAGATGTTACTGACTATG    | 139 | 123 |
| MID1211 | 12 | 0.0  | TGGAGGTAAAGAAAAACATTTCCC       | GATCAGCTCATCTAAGTCATGCTAAG      | 150 | 118 |
| MID1213 | 12 | 17.7 | AGGTAAAATAAACTAACTCCTTACTATG   | AGATGTCCCAGCATCCTTTG            | 147 | 125 |
| MID1221 | 12 | 31.4 | TGCTTAAAGACCCACTCCAATG         | GACCCACAGCAATTTGAATG            | 106 | 96  |
| MID1207 | 12 | 48.3 | GGACACAAATCTGTAGTTTGGG         | TTTGGCTTCCAGGGAAATAGATTAG       | 147 | 133 |
| MID1218 | 12 | 60.2 | AGATTGCTTCAACAGGATTGGT         | AAATAAAATCACAACTGATGATTTATCAC   | 136 | 115 |
| MID1311 | 13 | 0.0  | TTTTTCAGAAGTTAAGAGTTTTGTTTCCAG | AGAACGATACGCATGAGTATCTGC        | 150 | 131 |
| MID1324 | 13 | 10.4 | CTGCATCTTTAGGGGAGCG            | CCGCTTACAGATACTTCACAGTAC        | 110 | 95  |
| MID1322 | 13 | 23.0 | AACTAAATTTTACATTCTGAACAGAAAC   | TTAGAAAAATAAATTGAATTCAATCCAT    | 146 | 134 |
| MID1314 | 13 | 33.2 | TTCCTGAATTATTGATCCTGACAA       | GTCAAATGGCTAAACTAGACTGTCTG      | 103 | 90  |
| MID1306 | 13 | 44.0 | GCCTTTCTTCAAATCCACTGC          | GGAAAACAAAATATTAACACAGAAGCAT    | 161 | 142 |
| MID1317 | 13 | 51.9 | GCATTCACCAACAACCTGTGCATG       | TCTTCTCCTCAACTGAAGCCACTC        | 163 | 148 |
| MID1308 | 13 | 57.6 | GGCCCTTGAGACAGTAGCACTTG        | AGGATGGACGCACAGAGACAGA          | 155 | 138 |

|         |    |      |                                |                                |     |     |
|---------|----|------|--------------------------------|--------------------------------|-----|-----|
| MID1423 | 14 | 0.0  | G TTCCTACAAAGGTTGTCTTGGTG      | CTTTGACTAAACTGATTA AAAAGGCAG   | 187 | 170 |
| MID1414 | 14 | 17.4 | GCTGCAGATTTCTGTTGAGAC          | GGCCAAAAGTAGACTTTTATATTCTACTGG | 123 | 110 |
| MID1425 | 14 | 31.7 | GACAGTGAGGCGTGACGA             | TCCTTTAGGTTTTGGTGCCTC          | 107 | 97  |
| MID1424 | 14 | 39.8 | ACCAGAGTTCTGTGGCAAAG           | AATTTGTTTCCAAACCAACTGATG       | 99  | 85  |
| MID1416 | 14 | 58.2 | CATCTTCATGATCAATCATTTGACC      | CACTGCTGGAAGTTTGGATGAAG        | 202 | 157 |
| MID1511 | 15 | 0.0  | CCTGCAAAGCTTCTCACTCGC          | ACGCAAAGGCTGCATCTC             | 112 | 100 |
| MID1513 | 15 | 9.2  | GCAGGATATCCTTTGAAGAGTTCTG      | CTTCCTTTGGGTCCAACACC           | 154 | 138 |
| MID1505 | 15 | 19.8 | GTGTTTGTGAAACTCCTTTAAAGAGAAAAC | CCACATTAGTGGAGAACAGGATG        | 193 | 173 |
| MID1516 | 15 | 32.8 | CATCTGCACTTTATGAAACATGCT       | ATGCAGGCGTCATGGTCA             | 149 | 136 |
| MID1523 | 15 | 35.7 | TGGTAAATCTGCAGAACTTTAATATG     | AGGAAGCATCAAGGAAAATCTTAG       | 199 | 169 |
| MID1522 | 15 | 45.8 | GTTCTTTCTATGTTGTTTGTGCATG      | GGCCAACATTTATGCTATAAAACAAC     | 167 | 150 |
| MID1518 | 15 | 51.5 | CAGGCCTGTCCACATGAC             | GAAGATCAATCCATATTATTACCTG      | 151 | 133 |
| MID1611 | 16 | 0.0  | CCTTTCAGCATTGAACTTATGAAC       | CGATAACGATAAATGTGCGATTTG       | 149 | 136 |
| MID1626 | 16 | 21.5 | TTTTTTTATCTTAAATGAGAAGAAAGC    | CAAGGCAGCAACTGAACA             | 199 | 163 |
| MID1603 | 16 | 33.0 | AGTTTTGCTTTAGCTAAAACAAACAGG    | ATGTTTTTGCTAATATTTTCTGGAGAGAG  | 201 | 186 |
| MID1615 | 16 | 46.4 | GTTTTATTTCTGGTGTGTACCCATAG     | TGGAGTTACAATAACTGGAAAAATGAC    | 144 | 123 |
| MID1616 | 16 | 68.6 | TTTCAGGTAAACCGTCCATCTG         | GCCGCCTTATACTTCTTATCAAAG       | 189 | 162 |
| MID1721 | 17 | 0.0  | TGTTCTTCAAAAAACAGAAAAAGTGG     | GCAAAAAACCAACTAAAAACACC        | 149 | 134 |
| MID1715 | 17 | 13.0 | TTTTTACACTAGCATGGCAGTCTC       | TCACAGAGATGTGTTGGAACCA         | 103 | 91  |
| MID1717 | 17 | 28.4 | ATCCAGATTTTGTATCAACAATAGAAAC   | GCCCCGCACCAACAAAGTG            | 103 | 89  |
| MID1718 | 17 | 42.8 | AGAAGTCTGCATCTCTAGATTTGACTTT   | GGACGTGCCAAAAACAG              | 152 | 139 |

|          |    |      |                              |                              |     |     |
|----------|----|------|------------------------------|------------------------------|-----|-----|
| MID1725  | 17 | 51.3 | AGGACTCAGGCTTTAGAAACACC      | TTGATAAATGCACTACCTTTCTTTATTG | 102 | 91  |
| MID1719  | 17 | 62.6 | TTCAGCTGAGGAGCTCCG           | CTCCCTTCAACAATCTGAGAGC       | 203 | 178 |
| MID1830  | 18 | 0.0  | CAACCTGAAACACACAACAGC        | ATCAGATGACAACCTGACAGAG       | 150 | 135 |
| MID1812  | 18 | 6.9  | AAAAAAACAATAACAATGATCTCATTG  | TTAAAGTTGACCCCTAATTTAGCTTTT  | 139 | 121 |
| MID1814  | 18 | 19.2 | GTTTGTGTTTCAGTCAAAGCATG      | GGAAAAGGCCAGGGCTCT           | 151 | 134 |
| MID1806  | 18 | 31.5 | CCTAAGGGCTGACGGAGGAG         | AAAAACAAGGAACTGCCCCG         | 156 | 136 |
| MID1807  | 18 | 39.2 | CTTTATCTCTTCCATAAGGTAAATCAGC | AAAACCTCTAAGAGCCCGTAAATCC    | 204 | 180 |
| MID1808  | 18 | 53.8 | CTGGATTCATGAGATCATTCCGTC     | TGGGACAGCAAGTCAGAGATGG       | 154 | 135 |
| MID1921  | 19 | 0.0  | TGCGGCCACGGAGGAGG            | AGCACACAGGCACACGCG           | 156 | 138 |
| MID1924  | 19 | 11.6 | CACCCGTAAGTCTCTCTG           | GCAGGTTGACAAAGATCGTG         | 106 | 96  |
| MID1923  | 19 | 24.3 | GTTGAGCTGGCCTTATGCTC         | TTAAAAAGCCTCACTTTCGAGTTC     | 168 | 146 |
| MID1926  | 19 | 35.9 | CAAAATTAATCAAGAATAAGTGGACC   | CTTCTTTTAGGCTAAACTCTTTG      | 118 | 106 |
| MID1917  | 19 | 54.1 | TAAGTATCCCAACAACAGCTG        | ACAAATTGAGTGCAGACTGAGTG      | 199 | 165 |
| MID2011  | 20 | 0.0  | CATGTCCCGTAGAGCTTGT          | GTGTGGCAAACATGGACCA          | 105 | 92  |
| MID2014  | 20 | 16.5 | GCTAGTGAAGCATAAACCTGGTG      | GTCAAATACGTATTTACATGTAGGCCT  | 104 | 94  |
| MID2016  | 20 | 26.3 | TGGAAAATCAACTCTTTGAAAAGAAG   | TTAATTTTGCTAAAGGAATGAGGTTACA | 126 | 111 |
| G042S318 | 20 | 37.2 | CATAAACTAGACACTTGC GTTGTG    | CCTTACCGATGCCTTTGTGG         | 168 | 156 |
| MID2017  | 20 | 66.0 | TGCAACATCTTTCCAATTGG         | TTTTCTAATCTGAATAACTGCAGTGG   | 149 | 135 |
| MID2101  | 21 | 0.0  | GCAGCAGTAGATCTCAGGTCCATC     | TCTGCGTCTGATTGGCTGTAG        | 156 | 141 |
| MID2122  | 21 | 4.0  | TTCAGTCTAGTGGGTCTAGATG       | TTTTTCTATAACCATGGCATATG      | 105 | 96  |
| MID2112  | 21 | 18.7 | CTGCAGAGACTCTAGAACCCTCA      | TCTCTGCAGGCCTTGAACCT         | 155 | 125 |



|          |    |      |                               |                                |     |     |
|----------|----|------|-------------------------------|--------------------------------|-----|-----|
| MID2113  | 21 | 36.5 | TTTTACCTAAATTTAGGGTTTTCTTTCC  | CATTTACAACAAAACAGATGGAGC       | 152 | 132 |
| MID2126  | 21 | 49.4 | GAATGAAAAGGGATTTTACGTTC       | TTCTTCTGGAAAACAGTGCCA          | 156 | 135 |
| MID2124  | 21 | 59.6 | GATGTCGTCCACTTGCTTG           | TCTCCAGGTTATGTAATAACCA         | 106 | 93  |
| MID2116  | 21 | 65.9 | GTGTTAAATGAAACCTTGTAAGTT      | TTTGCATCCGTACAATATGTGC         | 152 | 129 |
| G021S407 | 21 | 70.7 | AGTACCTGATCCACACAAGCAG        | GGATGTGGAGTTGGATCAGCA          | 178 | 190 |
| MID2221  | 22 | 0.0  | ACTGCCCAATCGGGATG             | AGGGAGAACAGATTTTCATTCATG       | 148 | 134 |
| MID2211  | 22 | 16.6 | TCATAAATACATTTCTGGATCAGGC     | AGTAAAAAGGTCTAGCTGCTGTTACCT    | 196 | 152 |
| MID2222  | 22 | 31.7 | GATTAACCTAACTACCATTTTATTTACCG | ATGACAAAAACTTGCTTTTGCTAAG      | 128 | 116 |
| MID2212  | 22 | 36.5 | GGCTATGTGACTGGAACCTTCATTC     | TATTGTGGAGCTTTTAATTATTACAACGTC | 194 | 148 |
| MID2213  | 22 | 54.6 | TTTTTATGTTTTGTCCTGTTAAATTCAG  | TGTGAAGTGGATTTTTGGAGAAC        | 150 | 135 |
| MID2216  | 22 | 61.5 | AGCTTTATGAAATTGGACTTGAAATG    | TTCACAAACTAGCATGCTTTCAAT       | 150 | 133 |
| MID2311  | 23 | 0.0  | GGTTCACCTTAAAGCACCAATGTG      | TTTGTGCATGGCTCATCT             | 206 | 170 |
| MID2322  | 23 | 16.5 | TGTCCTTGATGTTGGAAAACAT        | TCCTCTGAAGCATATCTACTTCAATC     | 143 | 133 |
| MID2312  | 23 | 23.7 | CTTTTCTCTCACGTCTTTACAATGC     | CATTTACTTCTATTAACGTTTTCTTTTTA  | 113 | 100 |
| MID2313  | 23 | 34.2 | GGCTCCTCTAATAGATGCTGAACC      | ATATAGGGTAGTTGTATCGGCCATG      | 105 | 92  |
| MM05G07K | 23 | 50.6 | ACATCACAAAAGTGAGAACAGC        | CATCAGCACTTGAAAGCG             | 148 | 140 |
| MID2321  | 23 | 56.3 | AAACGGCAGCACAAATGTC           | AATTGTTGTGGTTTTGGACTTTC        | 102 | 94  |
| MID2305  | 23 | 64.1 | CATCGAGAAATCCTCGGTAACA        | TGGCCAGTGTACTAATTGTTTGC        | 203 | 239 |
| MID2411  | 24 | 0.0  | GTTTCGTCATCACCTATCAAAGGAG     | AATGACATGGCAAGCAACCA           | 198 | 162 |
| MID2428  | 24 | 10.8 | TATTTTATTAACACATTTGATTTGGC    | AGGGAGGTGGAGGAGGTG             | 141 | 122 |
| MID2412  | 24 | 19.0 | CAGTTCTATTTTCATTGCAGTCAAAG    | AGAATTCAGACATCTAAGTAAATTTGTG   | 150 | 120 |

|         |    |      |                            |                                  |     |     |
|---------|----|------|----------------------------|----------------------------------|-----|-----|
| MID2414 | 24 | 30.9 | TAAGGGCACCATACGACAGC       | CCAAAATGTTGCTGTTTTAGCA           | 108 | 96  |
| MID2421 | 24 | 38.8 | AAAAATGTTTATTTGCATGTTGATTG | AGCTGTTGTTTCATATTA AAAACTCAAAGAC | 154 | 136 |
| MID2425 | 24 | 54.7 | GTGGGAGCAAAGACTCATGG       | AGGTGAGAGCAGTCCAGCC              | 106 | 95  |

---

Position indicates a map distance. The map function is Haldane. All amplicon size were decided by MultiNA.
