# Supplementary material for: Genetic Analysis of Vertebral Regionalization and Number in Medaka (Oryzias latipes) Inbred Lines
Source: Oxford University Press journal article supplement (doi:10.1534/g3.112.003236), 2012-11-01
Supplement: 1317_figures1.pdf [file 1317_figures1.pdf]

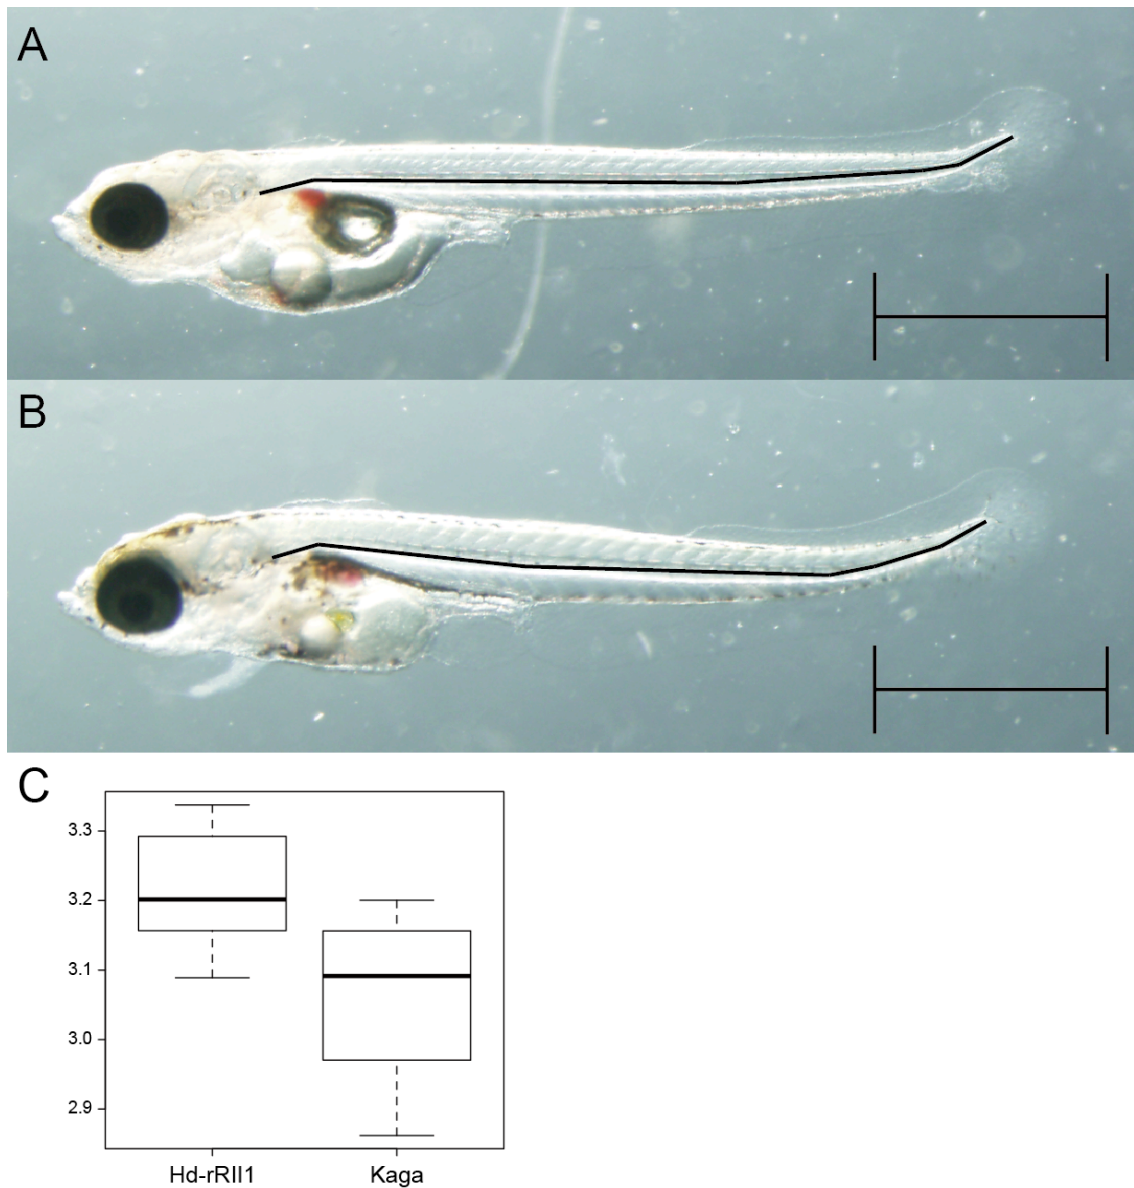

**Figure S1** Measure of fry of Hd-rRII1 and Kaga. Photo is seven days fry of Hd-rRII1 (A) and Kaga (B). The scale bars represent 1 mm. Straight line was drawn along with notochord and it was considered as trunk length. The length was measured in imageJ software. (C) Boxplot of the trunk length. The mean  $\pm$  S.E.M. of the trunk length of are  $3.22 \pm 0.02$  mm in Hd-rRII1 ( $n = 16$ ), and  $3.06 \pm 0.04$  mm in Kaga ( $n = 11$ ), respectively. Hd-rRII1 is longer than Kaga in this stage. The trunk length showed significant difference as judged by Welch's  $t$  test ( $p = 0.002$ ).
