# Supplementary material for: Genetic Analysis of Vertebral Regionalization and Number in Medaka (Oryzias latipes) Inbred Lines
Source: G3 (Bethesda). 2012 Nov 1;2(11):1317–23. doi: 10.1534/g3.112.003236 (PMC3484662; doi:10.1534/g3.112.003236)
Supplement: Supporting Information [file supp_2.11.1317_FileS1.xls]

## Sheet: Input data
Abdominal	Caudal	Vertebrae	Aratio	MID0111	MID0127	MID0124	MID0122	MID0117	MID0118	MID0119	MID0211	MID0221	MID0229	MID0215	MID0216	MID0231	MID0220	MID0311	MID0321	MID0316	MID0322	MID0323	MID0318	MID0421	MID0412	MID0414	MID0425	MID0424	MID0428	MID0418	MID0511	MM03D01K	MID0515	MID0517	MID0518	MM05D05K	MID0611	MID0602	MID0614	MID0623	MID0616	MID0711	MID0722	MID0723	MID0712	MID0703	MID0714	MID0706	MID0811
				1	1	1	1	1	1	1	2	2	2	2	2	2	2	3	3	3	3	3	3	4	4	4	4	4	4	4	5	5	5	5	5	5	6	6	6	6	6	7	7	7	7	7	7	7	8
				0	14.79	23.23	35.34	49.57	62.04	77.51	0	20.61	30.72	39.85	54.7	68.03	78.84	0	11.83	31.8	41.85	56.59	69.29	0	12.65	23.52	35.77	46.22	53.42	64.46	0	15.09	30.46	42.93	52.71	67.15	0	13.37	26.32	36.11	59.29	0	14.27	25.89	31.91	38.85	48.03	60.67	0
12	16	28	0.428571	H	H	H	H	H	H	A	H	A	A	A	A	A	A	H	H	H	H	H	H	H	H	H	H	A	A	A	B	B	B	H	H	A	H	B	B	B	B	A	H	H	H	H	H	H	H
13	16	29	0.448276	H	H	H	A	A	A	A	A	H	H	H	H	H	H	A	A	A	A	A	A	B	H	H	H	H	B	B	B	B	B	H	H	H	H	H	B	B	B	A	H	H	H	H	H	B	H
13	16	29	0.448276	H	A	A	A	H	H	H	A	H	H	H	H	H	H	B	A	A	A	A	A	B	B	H	H	H	A	A	B	B	H	H	H	H	H	H	H	H	H	H	H	A	A	A	A	A	A
13	15	28	0.464286	A	A	A	A	A	A	A	H	H	H	H	H	A	H	B	B	H	H	H	A	H	H	H	H	B	B	B	B	B	B	B	B	H	H	H	H	H	H	H	H	H	H	H	H	H	H
13	17	30	0.433333	B	B	A	A	A	H	H	B	B	B	B	B	B	H	H	H	A	A	B	B	H	H	H	H	H	H	H	A	A	H	H	H	B	H	H	H	H	H	H	H	H	H	H	H	H	H
13	15	28	0.464286	H	H	H	H	H	H	H	H	H	A	A	A	A	A	B	B	B	B	H	H	B	H	H	H	H	H	B	A	A	A	H	H	B	B	B	H	H	H	H	A	A	A	A	A	A	A
13	15	28	0.464286	H	H	H	H	B	B	B	H	H	H	H	B	B	B	B	B	B	B	H	H	A	A	A	A	A	A	A	H	H	H	H	A	A	H	H	H	H	A	A	A	A	A	A	A	A	B
12	17	29	0.413793	H	H	H	H	H	B	B	B	B	B	B	B	H	H	H	H	H	H	H	H	H	H	H	H	H	A	A	H	B	B	B	B	B	H	H	H	H	H	B	B	B	B	B	B	H	A
13	16	29	0.448276	A	A	A	A	A	A	A	A	H	H	H	H	H	H	B	B	B	H	H	A	H	H	H	B	B	B	B	H	B	H	H	H	B	H	A	A	A	H	H	H	H	H	H	H	H	H
13	16	29	0.448276	H	H	H	H	H	H	H	B	B	B	H	H	H	A	B	B	H	H	B	B	B	B	B	B	B	B	B	H	A	A	H	H	B	B	B	H	H	A	A	A	H	H	H	B	B	H
13	16	29	0.448276	A	A	A	A	H	H	A	H	H	H	H	H	H	H	A	A	A	A	A	A	H	H	H	H	H	H	H	H	B	H	A	A	A	H	H	H	H	B	A	A	A	A	A	H	H	B
13	16	29	0.448276	A	A	H	H	H	H	H	H	H	H	A	A	H	H	H	H	H	B	B	B	A	A	A	A	A	H	H	A	A	A	A	A	A	H	H	H	A	A	H	H	B	H	H	H	H	B
13	16	29	0.448276	H	H	H	H	H	A	A	B	H	H	A	A	A	A	H	A	A	A	A	H	H	H	H	H	H	H	H	B	B	B	B	B	B	B	B	B	B	B	H	A	A	A	A	H	H	B
12	16	28	0.428571	A	A	A	A	A	A	A	B	H	H	H	B	H	H	H	H	H	H	H	B	H	H	H	H	A	A	A	H	H	H	H	H	H	B	B	B	B	B	H	H	H	H	H	H	H	H
12	16	28	0.428571	B	B	H	H	H	B	H	H	A	A	A	A	H	H	B	B	B	H	H	H	A	A	A	A	A	H	H	A	H	H	A	A	H	H	H	H	H	H	H	H	B	B	H	H	H	H
13	16	29	0.448276	H	H	H	B	B	B	B	A	A	A	A	A	A	H	A	A	H	H	H	H	B	A	A	A	A	A	A	B	B	B	H	H	A	H	H	A	A	H	H	H	H	H	H	B	B	B
12	18	30	0.4	A	A	A	A	H	H	H	B	B	B	H	H	H	H	B	B	B	B	B	H	H	H	H	H	H	H	H	A	A	A	A	A	A	B	H	B	H	H	A	A	H	H	H	H	H	B
12	17	29	0.413793	A	A	H	H	H	H	B	A	A	H	H	H	H	H	A	A	A	A	H	H	H	H	A	A	A	A	A	H	H	A	A	A	A	A	A	A	A	A	A	A	A	A	A	H	H	B
12	17	29	0.413793	H	H	B	H	H	H	H	H	H	H	H	H	H	H	H	A	A	A	A	A	A	H	H	H	H	H	H	A	H	H	H	H	B	H	H	H	H	B	B	B	H	H	A	A	A	H
12	17	29	0.413793	H	H	H	B	B	B	H	B	B	B	B	B	B	B	B	H	H	H	H	H	B	H	H	H	B	B	H	B	B	B	B	B	H	H	B	B	B	B	A	A	H	H	H	H	B	A
13	16	29	0.448276	H	H	H	H	H	H	H	H	H	H	H	H	H	H	A	A	A	A	H	H	H	H	A	A	A	A	H	B	B	B	B	H	A	H	H	A	A	H	B	B	H	H	H	H	H	H
13	16	29	0.448276	B	B	B	B	H	H	H	H	A	A	A	A	A	H	A	A	A	A	A	A	B	B	B	B	B	B	B	B	B	B	B	B	B	A	A	A	H	H	H	H	H	A	A	A	A	B
13	16	29	0.448276	H	H	H	B	B	A	A	A	A	H	H	H	A	A	B	B	B	B	B	H	A	B	B	B	B	B	B	A	H	H	H	H	H	B	B	B	B	H	H	H	H	H	H	H	H	H
12	17	29	0.413793	A	A	A	A	A	A	A	H	A	A	A	H	H	H	H	H	H	H	H	H	B	B	B	B	H	A	A	H	A	A	H	H	H	H	H	H	H	H	A	A	A	H	H	H	A	H
12	16	28	0.428571	A	A	A	H	H	H	H	B	B	B	B	B	B	H	H	H	H	A	H	H	H	H	A	A	A	A	A	B	B	B	H	H	H	H	H	H	A	A	H	H	H	H	H	A	H	H
12	15	27	0.444444	H	H	H	H	H	H	H	B	B	B	H	H	A	A	H	H	H	H	H	H	B	B	B	B	H	H	H	H	H	B	B	B	B	B	H	H	H	A	H	H	H	H	H	H	H	A
14	16	30	0.466667	B	B	B	B	B	B	B	B	B	B	B	H	A	A	B	H	H	H	A	A	H	H	A	A	A	A	A	A	A	A	A	A	H	H	H	B	B	H	A	H	H	B	B	B	B	H
13	15	28	0.464286	H	H	H	H	H	H	H	H	H	B	B	B	B	B	H	H	A	A	A	H	H	H	B	B	H	H	H	B	B	B	B	B	H	H	H	A	A	A	A	A	A	A	A	A	A	H
13	16	29	0.448276	B	B	B	B	B	B	B	H	B	H	H	H	H	H	H	H	H	A	A	A	H	B	H	H	H	H	H	H	H	H	H	H	H	H	H	H	H	A	H	H	B	B	B	B	B	B
12	17	29	0.413793	B	B	H	H	A	A	A	B	B	H	B	B	B	B	B	B	B	B	H	A	B	B	B	B	H	H	H	A	H	H	B	B	B	B	B	B	B	B	H	H	H	H	H	H	H	H
13	16	29	0.448276	B	B	B	H	A	A	H	A	H	H	H	B	B	B	A	A	A	A	A	A	H	H	H	H	H	H	H	A	A	A	A	H	H	H	H	H	H	A	B	B	B	B	B	B	B	H
12	17	29	0.413793	H	A	A	A	A	A	H	H	H	H	H	H	H	H	H	H	A	A	H	H	H	H	H	H	H	H	H	B	B	B	B	B	B	A	H	H	H	H	B	B	B	B	B	H	H	A
12	15	27	0.444444	H	B	B	H	H	A	A	A	H	H	H	H	H	B	B	B	B	B	B	B	H	H	H	H	H	H	H	B	B	B	B	H	H	H	H	H	H	H	A	A	A	A	A	A	A	H
12	17	29	0.413793	H	H	H	H	H	H	A	A	A	A	A	A	A	A	H	H	A	A	H	H	H	H	H	B	B	B	B	H	A	A	H	H	H	H	A	A	A	A	B	B	H	H	H	H	H	H
13	16	29	0.448276	B	B	B	B	B	B	H	H	H	H	H	H	H	H	A	A	A	A	H	B	A	H	H	H	H	H	H	H	H	H	H	H	H	A	A	A	A	H	B	B	B	H	H	A	A	B
13	15	28	0.464286	H	H	H	H	H	H	A	H	B	B	H	A	A	A	A	A	A	A	A	H	H	H	H	H	H	H	H	H	H	A	A	A	A	B	B	H	H	A	A	A	H	H	H	H	B	A
12	16	28	0.428571	A	A	A	H	H	H	A	A	A	A	A	H	B	B	H	A	A	H	H	H	B	B	B	B	H	H	A	A	H	H	H	B	B	H	H	H	H	H	H	B	B	B	B	B	B	H
12	16	28	0.428571	A	A	A	A	A	H	B	A	A	A	A	A	A	H	H	H	H	H	B	B	B	B	B	B	B	H	H	B	B	B	B	H	H	H	H	H	H	A	H	H	H	H	H	B	B	B
13	16	29	0.448276	H	B	B	B	B	B	B	H	B	B	B	A	A	A	H	H	H	A	A	A	H	H	A	A	A	A	A	H	H	H	H	H	H	H	B	B	B	B	H	H	H	H	H	B	B	A
12	17	29	0.413793	H	H	A	A	H	H	H	H	H	B	B	H	H	H	H	H	A	A	A	H	B	B	B	H	H	H	H	A	A	A	H	H	H	A	A	A	A	A	A	A	A	A	A	A	A	H
13	15	28	0.464286	B	B	B	H	H	H	H	H	H	H	H	B	B	B	B	B	B	B	H	H	H	H	H	H	H	H	H	H	H	H	H	A	A	H	H	H	H	H	H	H	B	B	B	B	B	H
13	16	29	0.448276	B	B	B	B	B	H	A	H	B	B	B	B	H	A	B	B	B	B	A	A	H	H	B	B	B	B	B	A	A	A	A	A	A	B	B	H	H	H	H	H	H	H	H	H	H	H
13	15	28	0.464286	H	A	A	H	H	A	A	H	B	B	B	B	B	B	B	H	H	A	A	A	H	H	H	B	B	B	H	H	H	H	A	H	H	H	H	H	H	H	H	H	A	A	H	H	H	H
12	16	28	0.428571	B	H	H	H	H	H	H	B	B	B	B	B	H	H	B	B	H	H	H	H	H	H	H	A	A	A	A	A	A	H	H	H	H	A	H	H	H	H	B	B	B	B	B	B	B	A
13	17	30	0.433333	H	A	A	A	H	H	H	A	H	H	H	B	B	B	A	A	H	H	H	H	A	H	H	H	B	B	B	H	A	A	A	H	H	H	A	A	A	A	A	H	H	H	H	H	H	H
12	17	29	0.413793	H	H	H	B	B	H	A	A	H	H	H	H	H	H	H	A	A	A	A	H	H	A	A	A	A	B	B	A	A	A	A	A	A	B	H	H	A	A	H	B	B	B	H	H	H	A
13	16	29	0.448276	B	H	H	H	A	A	H	H	B	H	H	H	H	H	H	H	H	H	H	H	H	H	H	H	H	H	H	H	H	H	H	H	B	H	B	B	B	B	A	A	A	A	A	H	H	H
12	15	27	0.444444	A	H	H	H	H	H	H	B	B	B	B	B	B	H	H	H	A	A	A	A	A	A	H	H	B	B	B	A	A	H	H	H	B	H	H	A	A	A	B	B	B	H	H	H	H	H
13	15	28	0.464286	H	H	H	H	H	H	H	B	B	B	B	B	B	B	H	H	B	B	B	B	A	H	H	H	H	H	H	H	H	H	H	B	H	B	B	B	B	B	H	H	H	H	H	H	H	H
12	16	28	0.428571	B	B	B	H	H	A	H	H	H	H	A	A	H	H	A	A	H	H	H	H	B	B	B	B	H	H	H	H	B	B	H	H	H	B	B	H	H	A	H	A	A	A	H	H	H	A
13	15	28	0.464286	B	H	H	H	H	H	H	A	A	H	H	H	H	H	H	H	H	B	H	H	B	H	H	H	A	A	A	A	H	H	H	H	H	H	H	H	H	H	H	A	A	A	A	A	A	H
12	16	28	0.428571	B	B	B	B	B	B	B	H	B	B	B	B	B	B	B	B	B	B	B	B	H	H	H	H	B	B	B	B	B	H	H	H	H	B	B	B	B	H	A	A	A	H	H	H	H	H
13	15	28	0.464286	H	H	H	H	H	H	H	A	A	A	A	A	A	A	B	H	H	H	H	H	B	B	B	B	B	B	B	H	H	A	A	A	H	H	H	H	H	H	H	H	A	A	H	H	H	H
12	17	29	0.413793	H	H	H	H	A	A	A	A	H	H	H	H	H	B	A	H	H	H	H	A	H	H	H	H	H	H	H	H	A	A	A	A	A	H	H	A	A	H	H	H	H	H	H	H	H	H
13	16	29	0.448276	A	A	A	A	H	A	H	A	A	A	H	H	H	H	H	H	H	B	B	B	H	H	H	A	A	A	A	H	H	A	A	A	A	A	A	A	A	A	H	H	H	H	H	H	H	H
13	16	29	0.448276	H	H	H	H	B	B	B	B	H	H	H	H	H	H	H	H	H	H	H	H	H	H	B	B	B	H	H	H	H	H	H	H	H	H	B	B	B	H	B	B	B	B	B	H	H	A
13	16	29	0.448276	H	H	H	B	B	B	H	H	B	B	B	B	B	B	H	H	B	B	B	B	H	B	B	B	B	B	B	H	H	B	B	B	B	B	B	B	H	H	H	H	H	H	B	B	H	B
13	17	30	0.433333	H	H	H	H	H	H	H	H	H	A	A	A	A	H	B	B	B	B	B	B	A	A	A	A	A	H	H	H	H	H	H	H	H	H	H	B	B	B	H	H	H	H	B	B	B	H
12	16	28	0.428571	A	H	H	H	B	B	B	H	H	H	H	H	H	H	B	H	B	B	B	B	H	H	H	A	A	A	A	H	H	H	B	H	H	H	H	B	B	H	H	H	B	B	B	B	B	B
13	15	28	0.464286	A	A	A	H	H	H	B	B	B	H	H	H	B	B	B	B	B	H	H	H	H	H	A	A	A	A	A	H	H	B	B	B	H	H	H	H	H	H	H	H	H	H	A	A	A	A
13	16	29	0.448276	H	A	H	H	A	A	A	H	H	H	H	H	H	H	A	A	H	H	B	B	H	H	H	H	H	H	H	B	B	B	B	B	B	B	B	H	H	H	H	H	H	H	H	H	H	H
12	17	29	0.413793	B	B	B	B	B	B	H	H	H	H	H	H	B	H	A	A	A	H	H	H	B	B	H	H	H	H	H	H	H	H	H	H	H	H	H	H	H	A	H	H	B	B	B	B	B	H
13	16	29	0.448276	A	A	H	B	B	H	H	H	A	A	A	B	B	B	H	B	B	B	H	H	H	H	H	H	H	H	H	A	A	H	H	H	H	H	H	H	H	H	A	A	H	H	H	H	H	H
12	17	29	0.413793	H	B	B	B	H	H	H	H	H	H	A	A	A	A	H	H	H	H	H	H	A	A	A	A	A	A	H	H	H	H	H	H	H	H	H	H	H	H	H	H	A	A	A	A	H	A
12	15	27	0.444444	A	A	H	H	H	B	H	A	A	A	H	B	B	B	H	B	B	B	H	H	B	H	H	H	H	H	H	A	A	A	A	A	H	A	H	H	H	H	H	H	H	H	H	H	H	H
13	15	28	0.464286	H	B	B	H	H	H	H	H	H	H	H	H	B	B	H	H	H	H	H	H	H	H	H	H	H	H	A	A	A	A	A	A	A	H	H	B	B	B	H	H	H	H	H	H	A	B
13	16	29	0.448276	H	H	A	A	H	H	H	H	H	H	H	H	H	H	H	A	A	A	H	H	A	A	A	A	A	A	A	H	H	H	H	H	H	H	A	A	A	H	A	A	A	A	A	A	A	H
12	16	28	0.428571	B	B	B	B	B	B	H	H	B	B	B	B	H	H	H	H	A	A	H	H	B	B	B	B	B	B	H	H	H	H	H	H	A	H	H	H	H	H	B	H	H	H	H	H	A	H
12	16	28	0.428571	B	B	B	B	B	B	B	B	B	B	B	B	B	B	H	H	H	A	A	A	H	H	A	A	H	B	B	H	H	H	H	B	B	H	H	H	H	H	B	B	B	B	B	B	B	H
13	17	30	0.433333	H	H	H	A	A	H	B	H	H	H	H	H	A	H	A	A	H	H	H	H	H	H	H	H	H	H	H	B	B	B	B	B	B	H	H	H	H	H	H	H	H	H	H	B	B	B
12	17	29	0.413793	H	H	B	B	B	B	B	H	H	A	A	A	A	A	B	B	B	B	B	B	H	B	H	H	H	H	H	A	H	H	A	H	H	H	H	H	H	H	A	A	A	A	A	H	H	H
12	16	28	0.428571	A	A	A	A	A	A	A	A	A	A	H	H	H	H	B	H	H	H	B	B	H	H	H	H	A	A	H	H	H	H	H	H	H	B	B	B	B	B	B	B	B	B	H	H	A	H
12	16	28	0.428571	A	A	A	H	H	A	A	H	H	H	H	A	A	A	B	H	H	B	B	H	H	H	B	B	B	B	B	A	A	A	A	H	H	H	H	A	A	A	H	H	B	B	B	H	H	H
12	16	28	0.428571	H	B	B	B	H	H	H	B	H	H	H	H	A	A	H	H	A	A	A	B	A	H	H	B	B	B	B	H	H	A	A	A	A	A	A	A	H	H	A	A	H	H	B	B	B	B
12	16	28	0.428571	B	B	B	B	B	B	B	H	A	A	H	H	H	H	H	H	H	B	B	B	H	H	H	H	B	B	H	B	B	B	B	B	H	B	B	B	H	H	H	H	H	H	H	H	H	B
13	16	29	0.448276	H	H	H	H	A	A	A	A	H	H	H	H	A	A	H	H	H	A	A	A	A	A	A	A	H	B	B	B	H	H	H	H	A	H	A	A	A	A	H	H	H	H	H	H	A	H
12	17	29	0.413793	B	A	A	A	H	H	H	A	A	A	A	A	A	H	H	H	H	B	H	H	H	H	H	A	A	H	H	B	B	B	H	H	H	H	A	H	H	H	H	H	H	H	H	A	A	H
13	17	30	0.433333	H	H	H	H	H	H	H	B	H	H	H	B	H	H	A	A	A	A	H	H	B	B	B	H	A	A	A	A	A	A	H	H	H	A	A	H	H	B	H	H	H	H	H	H	H	B
13	16	29	0.448276	H	H	H	H	H	H	A	B	B	B	B	B	B	H	H	H	A	H	H	H	H	H	H	H	B	B	H	H	H	H	A	A	A	A	A	A	A	H	H	H	H	H	H	H	A	A
12	17	29	0.413793	A	A	A	A	A	A	A	H	H	H	H	H	B	H	B	B	B	B	B	H	H	H	H	H	H	H	H	H	B	B	B	B	B	B	H	H	H	H	H	H	H	H	H	H	H	H
12	16	28	0.428571	H	A	A	A	A	A	A	B	B	B	H	H	H	H	H	A	A	A	A	A	H	H	A	A	A	A	A	H	H	H	H	H	A	H	A	A	A	H	H	H	H	B	B	B	B	A
12	16	28	0.428571	H	H	H	H	H	H	H	H	H	A	A	A	A	A	A	A	A	H	H	H	A	A	A	A	A	A	A	B	B	B	B	B	H	B	B	B	B	B	B	H	H	H	H	A	A	A
12	16	28	0.428571	A	A	A	A	A	A	A	H	H	H	B	H	B	B	A	H	H	H	H	H	H	H	H	B	B	B	B	H	B	B	H	H	H	H	H	H	H	H	B	B	B	B	B	B	H	A
12	16	28	0.428571	B	H	H	H	H	H	H	A	H	H	H	H	H	H	H	A	A	A	A	H	B	B	B	H	H	H	H	H	H	H	H	H	H	H	H	H	H	H	H	A	A	A	A	H	H	A
13	16	29	0.448276	H	H	H	B	B	B	B	H	H	H	B	B	B	H	H	H	H	H	B	B	H	H	H	H	H	H	B	H	H	A	A	H	H	H	H	H	H	H	A	A	A	A	A	A	A	A
12	18	30	0.4	H	H	A	A	A	A	A	H	H	H	H	H	B	B	A	A	H	H	H	H	B	B	B	B	B	B	B	A	A	H	H	H	H	H	H	H	B	B	H	H	H	H	H	H	H	A
12	17	29	0.413793	B	A	A	A	A	A	A	H	H	H	H	H	H	B	B	H	B	B	B	B	H	H	H	A	A	A	H	B	B	B	B	B	B	H	H	H	H	H	A	A	A	H	H	B	B	B
13	16	29	0.448276	H	H	H	H	H	H	H	H	H	B	B	B	B	B	A	H	H	H	H	H	H	H	H	H	H	B	B	B	B	H	A	A	A	A	A	A	A	H	H	H	H	A	H	H	H	B
14	16	30	0.466667	H	H	H	H	A	H	B	A	A	A	H	H	B	B	A	H	H	H	H	H	H	H	H	H	H	B	B	B	B	H	H	B	B	B	H	H	H	H	B	B	B	H	H	H	H	B
13	17	30	0.433333	H	H	H	H	A	A	A	B	B	B	B	B	B	B	H	H	H	H	H	H	H	H	H	H	H	H	A	A	H	H	H	A	A	B	B	B	H	H	A	A	H	B	B	B	B	H
13	15	28	0.464286	A	A	A	H	H	H	H	B	B	B	B	B	B	B	H	H	A	A	A	A	A	A	A	A	H	H	H	H	H	A	A	A	H	B	B	B	H	H	H	H	H	H	H	H	H	B
13	16	29	0.448276	A	H	H	H	H	H	H	A	A	A	A	H	H	B	A	A	H	H	H	B	A	A	A	H	H	H	H	H	H	H	H	H	H	B	B	H	H	H	H	H	H	H	H	H	H	A
13	16	29	0.448276	H	B	B	B	H	H	B	H	H	H	B	H	H	H	B	B	H	H	H	H	A	A	A	A	A	A	A	B	H	H	B	B	B	B	B	B	B	B	B	B	H	H	H	H	H	H
13	17	30	0.433333	H	H	H	A	A	A	H	A	A	H	H	H	H	H	A	H	A	A	A	A	H	H	H	H	H	H	A	H	H	H	H	A	A	A	A	A	A	A	H	H	H	H	B	B	A	A
12	17	29	0.413793	H	H	H	H	H	H	H	B	B	B	B	H	H	H	A	A	A	A	A	H	H	H	H	H	H	H	A	H	H	H	A	A	H	B	H	H	A	A	B	B	B	B	B	H	H	B
13	17	30	0.433333	A	A	A	A	A	A	A	H	A	A	A	H	H	H	A	A	A	A	A	A	A	A	A	A	A	A	A	H	H	A	A	A	A	H	H	B	B	H	B	B	B	B	B	H	H	B
13	15	28	0.464286	A	A	A	A	A	H	B	B	H	H	H	B	H	H	B	B	B	H	H	H	H	H	H	A	A	A	A	H	H	H	H	H	H	B	B	B	B	H	H	H	H	H	H	H	H	B
12	16	28	0.428571	H	B	B	H	H	H	H	H	H	H	H	H	H	B	A	A	A	A	A	H	B	B	B	H	H	H	H	H	B	H	H	B	B	A	A	A	A	A	H	H	H	H	H	B	B	H
13	15	28	0.464286	H	H	H	H	H	H	H	B	B	B	H	H	H	A	H	H	H	H	H	H	A	H	H	B	B	B	B	H	B	B	H	H	H	A	A	H	H	H	A	A	A	A	A	A	A	H
13	15	28	0.464286	B	B	B	B	H	H	A	H	H	H	H	H	A	A	B	B	H	H	H	H	A	H	H	H	H	H	H	A	H	H	H	H	H	B	H	H	H	H	B	H	H	H	H	H	H	H
13	14	27	0.481481	H	H	H	B	B	B	B	H	H	H	H	H	B	B	H	H	H	B	B	B	H	H	H	H	H	H	H	H	H	H	H	H	A	H	H	H	H	B	B	B	B	B	B	H	H	A
13	16	29	0.448276	H	A	A	A	A	A	A	B	B	B	B	H	H	A	A	A	A	A	H	H	H	A	A	A	A	A	A	B	B	B	B	B	B	B	B	H	A	A	H	A	A	A	A	A	H	H
13	15	28	0.464286	H	H	H	H	A	A	A	A	A	A	H	H	H	H	H	H	H	A	A	H	H	H	B	B	B	B	H	A	A	A	H	H	H	B	B	B	B	H	H	H	H	H	H	H	H	B
13	16	29	0.448276	H	H	H	H	H	H	H	H	H	A	H	H	H	B	B	B	B	B	B	B	H	B	B	B	B	B	B	H	H	H	A	A	A	B	B	H	H	H	H	H	H	B	B	H	H	B
14	15	29	0.482759	H	H	H	H	H	H	H	H	H	H	H	H	H	H	B	B	B	B	B	B	H	H	H	H	H	H	A	H	H	H	H	H	B	H	H	H	H	B	H	H	H	H	H	H	A	H
13	16	29	0.448276	B	B	B	B	B	H	H	B	B	B	B	B	H	H	H	H	B	B	B	B	H	H	A	A	A	H	H	B	B	H	H	H	A	H	B	B	B	H	H	H	H	H	H	H	H	H
13	15	28	0.464286	B	B	B	B	B	B	B	H	H	H	H	H	H	H	H	B	B	B	H	H	H	A	A	A	A	A	H	A	A	H	H	H	B	H	H	B	B	B	H	H	A	A	A	A	A	B
13	15	28	0.464286	H	H	H	H	B	B	H	B	B	B	B	B	B	B	B	H	H	H	H	H	A	A	A	A	A	H	H	A	A	H	H	H	H	H	H	B	B	B	A	H	H	H	H	H	H	A
14	15	29	0.482759	A	A	A	A	H	H	H	H	H	H	H	H	H	A	B	H	H	H	H	H	B	B	B	B	B	B	H	B	B	B	B	B	B	H	H	H	H	H	B	H	H	H	H	H	H	H
13	15	28	0.464286	B	B	B	B	B	B	B	B	B	B	B	B	B	B	H	H	H	H	H	H	A	H	H	H	H	H	H	B	B	B	B	H	H	B	B	B	B	B	A	H	H	H	B	B	B	H
13	16	29	0.448276	H	H	H	H	B	B	H	H	B	B	B	B	B	B	A	A	H	A	A	H	A	A	A	H	H	H	B	H	H	H	H	A	A	B	B	B	H	H	H	H	H	H	H	A	A	H
12	16	28	0.428571	H	H	H	H	H	H	H	B	H	H	H	H	H	H	H	H	H	B	B	H	H	H	H	A	A	A	A	B	H	A	A	A	A	B	H	B	H	H	H	B	B	B	B	H	H	A
13	15	28	0.464286	A	A	A	A	A	A	A	A	A	H	H	H	H	H	H	H	H	H	H	H	H	H	A	A	A	A	A	H	H	A	A	H	H	B	H	H	H	H	H	H	A	A	A	A	A	A
13	16	29	0.448276	H	H	H	H	H	B	B	H	A	A	A	A	A	A	A	A	H	H	H	H	H	A	A	A	A	A	A	H	H	H	B	B	H	H	H	B	H	H	A	H	H	H	H	H	H	H
13	15	28	0.464286	H	H	H	B	B	B	B	H	H	H	A	A	A	H	A	A	H	H	H	H	H	H	H	H	H	A	A	B	B	H	H	H	H	B	B	B	A	A	H	H	H	H	H	H	H	H
13	16	29	0.448276	H	H	B	B	B	B	H	B	B	B	B	B	B	B	B	B	H	H	H	H	B	B	H	H	H	B	B	A	A	A	A	A	H	H	H	H	A	A	H	A	A	A	H	H	H	H
13	16	29	0.448276	H	H	H	A	A	A	A	H	A	A	A	A	A	A	A	A	A	A	H	H	B	B	B	H	H	H	H	A	A	A	H	H	H	B	B	B	B	B	H	H	H	H	H	H	B	A
12	15	27	0.444444	B	H	H	H	H	B	B	H	H	H	A	H	H	H	H	H	B	B	B	B	H	H	A	A	A	A	A	B	B	B	B	B	B	H	H	H	H	B	H	H	H	H	H	H	H	B
13	16	29	0.448276	H	H	H	H	A	H	H	B	H	H	H	H	H	H	H	H	H	H	H	H	A	A	A	A	A	A	A	A	A	A	A	A	H	B	B	B	B	H	A	A	A	A	A	A	A	B
12	16	28	0.428571	H	B	B	B	B	B	B	B	B	H	H	H	H	A	H	H	H	H	H	A	H	B	B	B	H	H	H	H	B	B	B	B	H	H	H	H	H	H	B	B	B	B	B	B	B	A
13	15	28	0.464286	H	H	B	B	B	B	B	H	A	A	A	A	B	B	A	A	H	H	B	B	B	H	A	A	A	A	A	B	B	B	B	B	B	H	H	H	H	H	H	B	B	B	B	B	H	H
13	16	29	0.448276	H	H	H	H	H	A	A	H	H	A	A	A	A	A	A	A	A	A	B	B	B	B	B	H	H	H	H	H	B	B	B	B	B	H	H	H	A	A	H	H	H	H	H	H	H	A
13	16	29	0.448276	H	H	A	H	B	B	B	A	A	A	A	A	H	H	H	H	H	H	H	B	H	A	A	A	H	B	B	A	A	A	A	H	H	A	A	A	H	B	H	H	A	A	A	A	H	H
13	16	29	0.448276	B	B	B	B	B	B	B	H	H	H	H	B	B	B	H	H	H	B	H	H	H	H	B	H	H	H	H	H	A	A	A	A	H	H	B	B	B	H	H	B	B	B	B	B	B	H
13	15	28	0.464286	H	H	A	A	H	H	B	H	H	H	H	H	H	H	H	H	H	H	H	H	H	H	B	B	B	B	B	H	H	H	H	H	H	H	H	H	H	H	H	H	H	B	B	B	B	A
13	15	28	0.464286	H	H	H	H	H	B	B	B	B	B	B	B	B	B	B	B	H	H	H	H	A	A	A	H	H	H	B	H	H	H	H	H	H	H	H	B	H	H	B	H	A	A	A	A	H	H
13	16	29	0.448276	A	A	A	A	A	A	H	A	A	A	A	H	H	H	H	H	H	H	H	H	H	H	H	A	A	A	A	H	H	H	B	B	B	H	H	H	H	H	H	H	H	H	H	B	B	H
13	16	29	0.448276	B	B	B	H	H	H	H	B	A	A	A	A	A	H	H	H	H	A	H	H	A	A	A	H	B	B	B	H	H	A	A	A	H	A	A	A	A	A	H	H	H	H	H	H	A	H
13	17	30	0.433333	A	A	A	A	A	A	A	A	A	A	A	A	A	A	A	A	A	A	A	A	H	H	H	H	H	B	B	B	B	B	B	B	B	A	A	A	A	H	A	H	H	H	H	H	H	B
13	15	28	0.464286	H	H	H	H	H	H	H	H	H	H	H	H	H	H	B	B	B	B	B	B	B	B	B	H	A	A	A	H	H	B	B	B	B	H	A	A	A	A	H	H	H	H	B	B	B	A
13	16	29	0.448276	B	B	H	A	A	A	A	H	H	H	H	H	A	A	H	H	B	B	B	A	H	H	H	H	B	B	B	B	B	B	B	B	B	A	A	H	B	B	H	H	A	A	A	A	H	A
12	17	29	0.413793	H	B	B	B	B	H	H	H	H	H	H	B	B	B	A	A	H	H	H	H	H	H	H	A	A	A	A	H	H	H	H	H	H	H	H	B	B	H	B	B	B	H	H	A	A	B
13	15	28	0.464286	B	B	B	H	H	H	H	H	A	H	H	H	H	H	B	B	B	B	B	H	B	B	B	B	B	B	H	A	A	H	H	H	H	H	H	A	A	H	H	H	H	A	A	A	A	H
12	17	29	0.413793	H	B	B	B	H	H	H	H	A	H	H	H	H	H	H	H	A	A	A	A	H	H	H	H	H	H	H	A	A	A	A	A	A	B	H	H	H	A	H	H	H	H	H	H	H	H
12	15	27	0.444444	H	H	H	H	A	A	A	H	H	B	B	B	B	B	H	H	H	H	H	H	B	B	B	H	A	A	A	H	A	A	H	H	H	B	B	B	B	H	H	H	H	A	A	A	H	A
12	16	28	0.428571	H	H	H	H	H	B	B	H	H	H	A	A	A	A	H	H	B	B	H	H	B	B	B	B	B	B	B	H	A	A	A	A	H	H	H	H	H	B	H	B	B	B	H	H	H	A
12	16	28	0.428571	B	B	B	B	B	B	H	B	B	B	B	H	H	H	H	A	H	H	H	H	B	H	H	H	H	H	H	A	A	H	H	H	H	B	B	H	H	H	H	A	A	A	A	A	A	H
13	16	29	0.448276	H	A	A	A	A	A	H	B	B	H	H	H	H	A	H	A	A	A	A	A	B	B	B	B	B	B	B	H	H	H	H	H	H	A	A	H	H	H	A	H	H	H	H	H	H	A
13	15	28	0.464286	H	H	A	A	A	A	A	B	B	B	B	B	B	B	H	B	H	B	B	B	B	B	B	B	B	B	B	A	H	B	B	B	B	B	B	B	B	B	H	B	B	B	H	H	H	A
12	16	28	0.428571	H	H	H	H	A	A	A	A	A	H	H	B	B	B	H	B	B	B	B	H	A	A	A	A	A	A	A	H	H	B	B	B	H	B	B	H	H	H	H	A	A	A	A	A	A	A
12	15	27	0.444444	H	H	H	A	A	A	A	B	B	B	B	H	H	H	H	H	H	H	H	A	H	A	A	A	A	A	H	B	B	B	H	H	H	H	H	H	A	A	H	A	A	A	A	A	A	H
13	16	29	0.448276	B	H	H	H	A	A	A	H	H	H	H	H	H	H	A	A	A	A	A	A	H	H	H	H	H	H	H	H	B	B	B	B	B	A	A	A	A	A	B	B	B	B	B	B	B	A
13	16	29	0.448276	A	A	H	H	A	A	A	H	H	H	H	H	H	H	A	A	A	A	A	A	H	H	H	B	B	B	B	H	H	A	A	A	H	H	H	H	A	H	H	H	H	H	H	H	H	H
13	16	29	0.448276	A	H	H	H	H	H	H	A	A	A	A	A	A	A	A	H	B	B	B	H	H	H	H	B	B	H	H	H	H	H	H	H	H	H	H	A	A	A	A	H	H	H	H	H	B	H
13	16	29	0.448276	B	H	H	A	A	A	H	A	A	A	A	A	A	H	B	B	B	H	H	A	A	A	H	H	H	H	B	H	H	A	A	A	A	H	H	H	B	H	A	A	A	A	A	A	H	H
12	15	27	0.444444	A	A	H	H	B	B	B	A	A	A	A	A	A	A	H	B	B	B	B	B	B	B	B	B	B	B	H	B	B	H	H	A	A	B	B	H	H	H	B	B	B	B	B	B	H	A
13	15	28	0.464286	H	H	H	A	A	A	A	B	H	H	H	H	H	H	B	B	H	H	H	A	A	H	H	H	H	H	H	H	B	H	H	H	H	H	B	B	H	H	B	B	H	H	H	H	H	H
12	17	29	0.413793	B	B	B	B	B	B	B	H	B	B	H	H	H	H	B	B	B	B	H	H	H	B	B	B	B	B	B	A	A	H	H	H	H	H	H	A	A	A	B	B	B	B	B	B	H	H
13	16	29	0.448276	H	A	A	A	A	H	H	H	H	B	B	H	A	A	H	H	B	B	H	H	A	A	H	H	H	H	H	H	B	B	B	B	B	B	B	B	B	H	B	H	H	H	H	H	H	B
13	16	29	0.448276	H	H	H	H	A	H	H	B	H	H	H	H	A	A	H	A	H	H	H	H	A	A	H	H	H	A	H	B	H	H	B	B	B	A	H	H	H	B	H	H	H	B	B	B	B	H
12	16	28	0.428571	B	H	H	H	H	H	H	H	H	H	H	A	A	H	A	A	H	H	H	H	H	H	H	H	A	A	A	A	A	A	A	H	H	B	B	B	B	B	A	A	A	A	A	A	A	H
12	16	28	0.428571	H	H	H	H	H	H	A	H	H	H	H	B	H	H	A	A	A	A	H	H	A	H	B	B	B	B	B	H	H	A	A	H	H	A	A	A	A	A	H	H	B	B	B	B	B	A
12	16	28	0.428571	B	B	B	B	B	B	B	A	A	A	A	H	H	H	B	B	B	B	B	H	H	H	H	A	A	A	A	H	H	B	B	B	H	B	B	B	B	B	H	H	H	H	H	H	A	A
13	16	29	0.448276	H	H	A	A	A	H	B	A	H	H	H	H	H	H	H	H	H	H	H	H	H	H	H	H	H	H	A	H	B	B	B	B	H	A	H	H	H	B	H	B	B	B	B	H	H	B
13	16	29	0.448276	H	B	B	B	B	B	B	H	A	A	A	H	H	H	H	H	H	H	H	H	B	B	B	H	H	H	H	B	B	B	H	H	H	H	H	H	B	B	B	H	H	H	H	H	A	A
13	16	29	0.448276	B	B	B	B	B	H	H	H	H	H	H	H	H	H	H	H	H	B	B	H	H	H	H	H	H	H	H	B	B	B	B	B	B	H	H	B	B	B	H	H	B	B	H	H	H	H
12	16	28	0.428571	H	B	B	B	B	B	H	A	A	A	A	H	H	B	H	H	B	B	B	H	A	A	A	H	H	H	B	A	A	H	H	H	H	A	H	H	H	H	H	H	H	H	H	H	B	A
13	16	29	0.448276	B	H	H	A	A	A	A	H	H	H	H	A	A	A	H	H	B	B	H	H	B	B	B	B	B	B	H	B	B	B	B	B	B	A	A	A	A	H	B	B	B	B	B	B	B	B
12	16	28	0.428571	H	B	B	B	H	B	B	A	A	A	A	A	H	H	H	B	B	B	B	B	A	A	A	H	H	H	H	H	A	A	H	H	H	B	B	B	B	B	H	H	B	B	B	B	B	B
12	16	28	0.428571	H	B	H	H	H	H	B	H	B	B	B	H	H	H	H	B	B	H	H	H	A	H	H	H	A	A	A	H	H	A	H	H	H	H	H	H	H	A	H	B	H	H	H	H	A	B
12	17	29	0.413793	A	A	A	A	A	A	A	A	A	A	A	A	A	H	B	B	B	B	B	H	H	H	H	H	B	B	B	H	A	A	A	H	H	H	A	A	A	H	A	A	H	H	H	H	H	A
13	16	29	0.448276	B	B	B	B	B	H	H	H	A	A	A	A	A	A	H	H	H	H	H	H	H	H	H	H	H	B	B	H	H	H	H	H	H	B	H	H	H	H	H	H	H	B	B	B	B	H
12	16	28	0.428571	B	B	B	B	B	B	B	H	H	H	A	A	A	A	A	A	A	H	B	B	B	B	H	H	H	H	H	A	H	H	H	H	H	B	B	B	B	H	H	H	B	B	B	B	B	H
12	16	28	0.428571	H	B	B	B	H	H	H	A	H	B	B	B	B	B	B	B	B	B	B	B	B	B	B	B	B	B	B	H	H	B	B	H	H	B	B	B	B	B	H	A	A	A	A	A	A	A
14	16	30	0.466667	H	H	A	H	H	H	H	H	H	H	A	A	A	A	H	H	A	A	A	H	B	B	H	H	H	H	H	A	A	A	A	A	A	B	B	B	H	H	B	H	H	H	H	H	A	H
12	16	28	0.428571	B	H	H	H	A	A	A	H	H	H	B	B	H	H	B	B	B	B	B	B	A	A	A	A	A	A	A	H	H	H	H	H	A	H	B	B	B	B	B	B	B	B	B	B	B	A
13	17	30	0.433333	A	A	A	A	A	A	H	H	H	A	A	H	H	H	H	H	H	H	A	A	A	H	H	H	H	H	H	H	H	H	H	H	B	A	A	A	A	H	H	H	H	H	H	H	H	H
13	14	27	0.481481	H	B	B	B	B	H	H	B	B	H	H	A	A	A	H	H	H	H	H	H	B	H	H	H	H	H	A	H	H	H	B	B	B	B	B	B	B	H	H	H	H	H	H	H	H	H
12	17	29	0.413793	H	B	B	B	B	B	H	A	H	H	H	H	H	H	H	H	H	H	H	H	B	B	B	B	B	B	B	H	B	B	B	B	B	B	B	B	B	H	A	H	H	H	H	H	B	H
13	16	29	0.448276	A	A	A	A	H	H	H	B	H	A	A	A	A	A	A	A	A	A	A	A	H	H	H	H	A	A	A	H	B	B	B	B	B	H	H	H	H	H	A	A	H	H	H	H	H	A
13	17	30	0.433333	A	A	A	A	H	H	H	H	A	A	A	H	H	H	B	B	H	H	H	H	H	H	H	H	H	H	A	H	H	H	H	A	H	H	H	B	B	H	A	H	H	H	H	H	H	H
13	16	29	0.448276	B	B	B	B	H	H	H	H	H	A	A	A	A	A	B	B	H	H	A	A	B	B	B	B	B	B	H	B	A	A	H	H	H	H	H	H	H	H	B	B	B	B	B	B	B	H
13	16	29	0.448276	H	H	H	A	A	A	A	A	H	H	H	H	A	A	B	B	B	B	H	H	H	B	H	H	H	H	A	A	A	A	H	H	H	B	H	H	H	A	B	B	B	B	B	B	B	A
12	17	29	0.413793	A	A	A	A	A	A	H	H	H	H	H	H	H	H	H	H	H	H	H	H	H	H	H	H	A	A	A	A	A	A	H	H	H	B	B	H	H	H	A	A	A	A	A	H	A	H
13	16	29	0.448276	H	H	H	H	H	H	H	B	B	B	B	B	H	H	H	H	H	H	A	A	H	H	H	B	H	H	H	H	H	H	H	H	H	B	B	B	H	H	B	B	B	B	B	B	B	A
14	16	30	0.466667	B	B	B	H	H	A	A	H	H	H	H	H	H	H	A	A	A	H	H	H	H	H	H	H	H	H	H	H	B	B	B	B	B	A	H	H	H	B	H	H	H	H	H	H	H	H
13	15	28	0.464286	H	B	B	B	B	B	H	H	H	H	H	B	B	H	H	H	H	A	A	A	A	A	A	A	A	A	H	A	A	H	H	B	B	H	H	H	H	A	H	H	H	H	H	H	H	H
13	16	29	0.448276	A	A	A	A	A	H	H	H	A	A	A	A	A	A	A	A	H	B	B	B	A	A	H	H	H	H	B	A	A	A	A	H	H	H	A	A	A	H	A	A	H	H	H	H	H	A
12	16	28	0.428571	H	H	H	H	B	B	A	A	A	A	A	A	A	A	H	H	B	B	H	H	B	B	H	H	H	H	A	H	H	H	H	H	B	H	H	H	H	H	H	H	H	B	B	B	H	H
13	16	29	0.448276	A	A	H	B	B	B	B	H	H	A	H	H	H	H	H	B	H	H	H	H	A	A	A	A	A	A	A	B	B	B	B	B	B	H	H	H	H	A	H	H	B	B	B	B	B	A
13	15	28	0.464286	B	B	H	H	H	H	H	B	B	B	B	B	H	A	H	H	H	H	H	H	B	H	H	H	H	H	H	A	A	A	A	A	A	B	H	H	H	H	H	H	B	B	H	H	H	H
13	15	28	0.464286	H	H	H	H	H	H	A	B	B	B	B	B	H	H	A	H	H	H	H	H	A	A	H	H	H	H	H	B	B	B	B	B	B	B	B	B	H	H	A	H	H	H	B	B	B	B
13	16	29	0.448276	A	A	A	A	H	H	H	H	B	H	H	H	H	H	H	H	H	H	H	H	B	B	B	B	B	B	B	H	H	H	H	H	H	B	B	B	B	B	A	A	A	H	H	H	B	H
13	16	29	0.448276	A	A	A	A	A	A	A	H	B	H	H	H	H	H	H	H	B	B	B	B	H	H	H	H	H	H	B	B	H	H	H	H	H	A	H	H	B	B	H	H	B	B	H	H	H	H
13	16	29	0.448276	A	A	A	A	A	H	H	H	B	B	B	B	B	B	B	B	B	B	B	H	A	H	H	B	B	B	B	A	A	A	A	A	A	A	A	A	A	A	H	A	A	A	A	A	A	H
13	16	29	0.448276	H	H	H	B	B	A	A	B	H	H	H	H	A	A	B	B	B	B	B	B	A	A	A	H	H	H	H	B	H	H	H	H	H	H	H	H	H	H	H	A	A	A	A	A	A	H
13	16	29	0.448276	H	A	A	A	A	H	H	H	H	H	H	A	A	A	H	H	H	H	H	H	A	H	H	H	H	H	H	H	H	B	B	B	B	H	H	H	H	H	H	A	A	A	A	H	H	A
12	16	28	0.428571	B	B	B	B	B	B	H	H	H	H	H	H	H	H	H	H	H	H	H	H	A	A	A	A	A	A	A	H	H	H	H	B	B	B	B	B	B	H	A	A	A	A	A	A	A	B
13	17	30	0.433333	H	A	A	A	A	A	A	B	H	H	H	H	H	H	H	A	A	A	A	A	B	B	B	B	B	B	B	H	H	H	H	H	B	B	B	B	B	B	A	A	A	A	A	A	H	B
12	16	28	0.428571	B	B	H	A	A	A	A	B	B	B	B	B	H	H	B	B	H	H	H	A	H	H	H	A	H	H	H	B	B	B	B	B	B	H	B	B	B	H	H	H	H	H	B	B	B	H
12	16	28	0.428571	H	H	H	H	H	H	H	B	B	B	B	B	B	B	B	H	B	B	B	H	A	H	H	H	H	B	B	B	H	A	A	A	A	H	H	H	H	A	H	H	H	H	A	A	A	H
13	15	28	0.464286	H	H	H	H	H	H	H	B	H	H	A	A	A	A	B	B	H	H	H	H	A	A	A	H	H	H	H	A	A	H	H	B	B	H	B	B	B	H	H	H	H	H	H	H	A	H
12	15	27	0.444444	H	H	H	H	H	A	A	H	H	A	H	H	H	H	A	A	A	A	A	A	H	A	A	A	A	A	A	H	H	H	B	B	B	H	H	A	A	H	B	B	B	H	H	H	H	B
11	16	27	0.407407	H	B	B	B	B	H	H	A	A	A	A	H	H	B	A	A	A	A	A	A	A	A	H	H	A	A	A	H	B	B	B	B	B	H	H	H	A	A	H	H	H	H	H	H	A	B
13	17	30	0.433333	B	B	B	H	H	H	H	H	H	A	A	H	H	H	H	H	H	A	A	A	H	H	H	H	H	H	H	B	B	B	H	H	H	H	B	B	B	H	H	H	H	H	H	H	H	A
13	15	28	0.464286	B	B	B	B	B	B	B	H	H	H	H	H	H	H	H	H	B	B	H	H	A	A	A	A	A	A	A	A	H	H	B	B	B	B	B	B	B	H	H	H	H	H	A	A	A	B
13	15	28	0.464286	B	B	H	H	H	H	H	B	B	B	H	H	H	H	H	H	B	B	B	B	A	A	A	H	B	B	B	H	H	H	H	H	H	H	H	H	H	H	A	H	H	H	H	H	H	A
12	15	27	0.444444	H	H	B	B	B	B	B	B	B	B	B	H	H	A	A	A	A	A	A	A	H	H	H	H	H	H	H	B	B	B	B	B	H	H	H	H	H	H	H	H	H	H	H	A	A	A
12	16	28	0.428571	B	B	B	B	H	H	A	A	H	H	H	A	A	A	H	H	B	B	B	B	H	H	H	A	A	A	A	A	A	A	A	H	H	H	H	H	B	B	A	H	H	H	H	H	B	H
13	17	30	0.433333	A	A	A	A	A	A	A	H	H	H	H	H	A	A	B	B	B	B	H	H	H	H	B	B	B	B	B	H	H	A	A	A	A	B	H	H	H	H	H	H	H	H	H	H	H	H
[truncated: 101 more columns]
